# Supplementary material for: The Tumor Suppressor DAB2IP Is Regulated by Cell Contact and Contributes to YAP/TAZ Inhibition in Confluent Cells
Source: MDPI journal article supplement (doi:10.3390/cancers15133379), 2023-06-27

Figure S1A

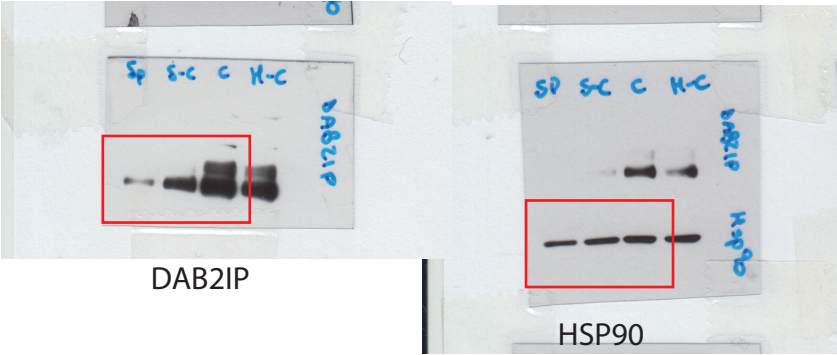

Figure S1B

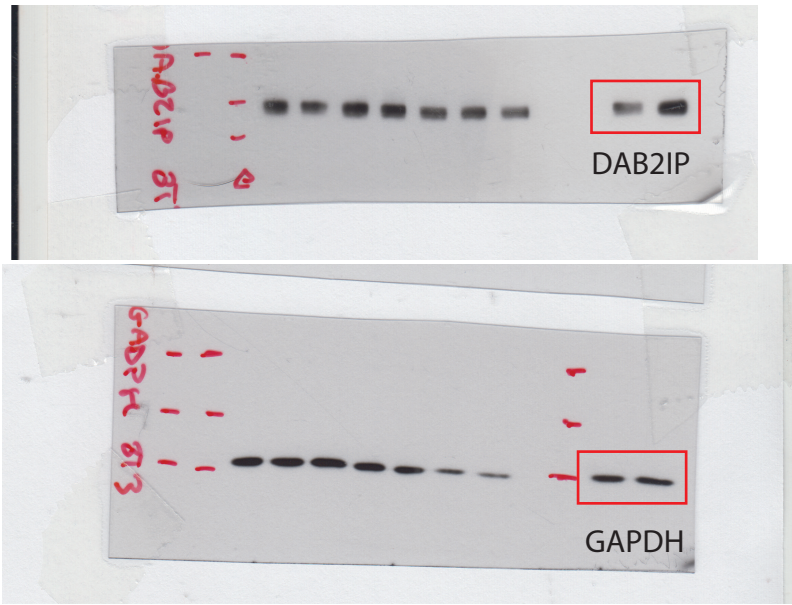

Figure S1C

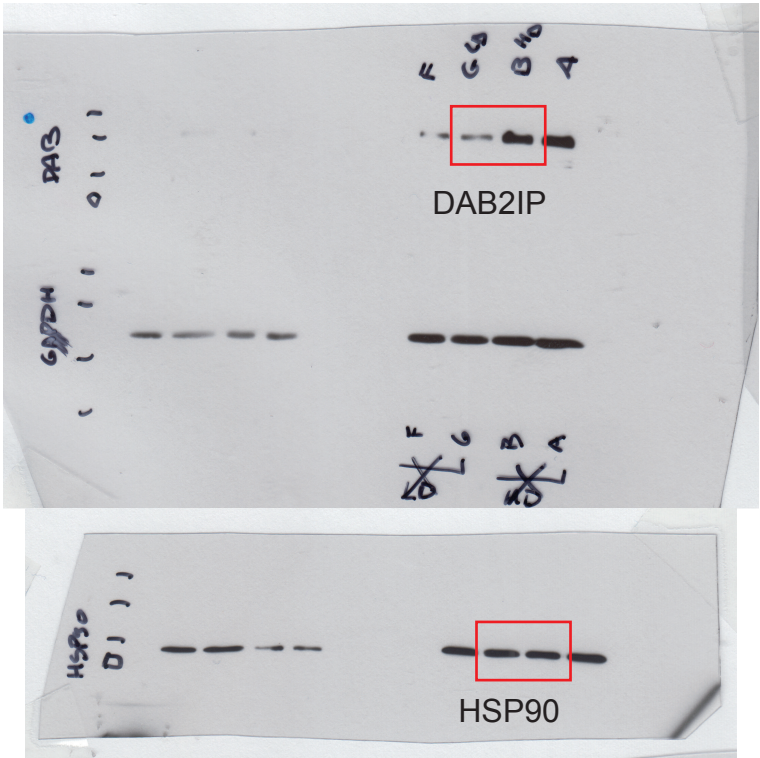

Figure S1D

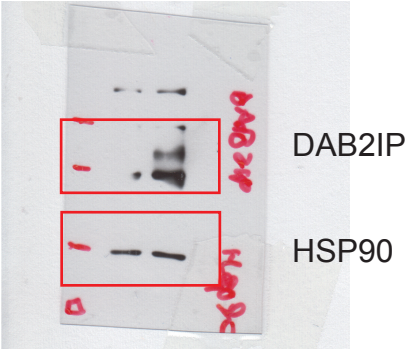

Figure S2A

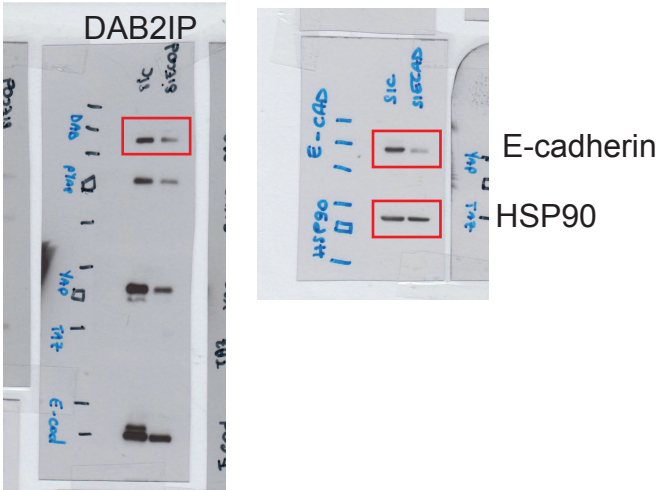

Figure S2D:

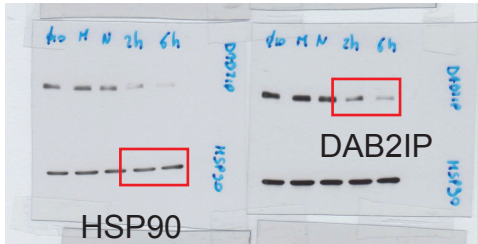



Figure S3A

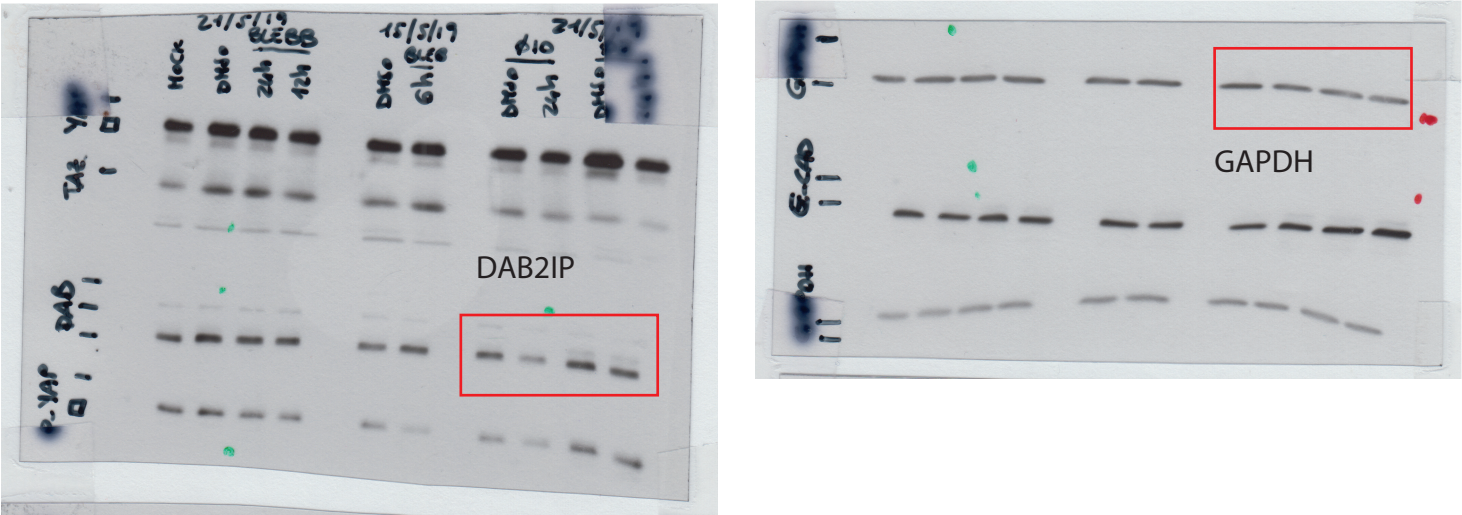

Figure S3B: subconfluent

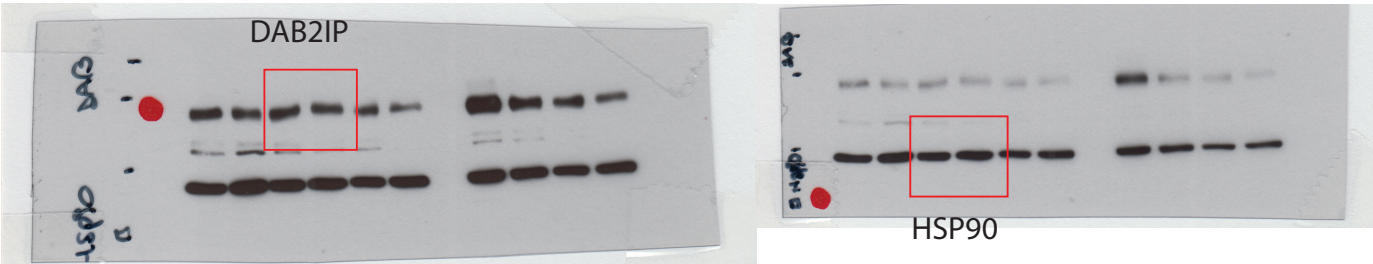

Figure S3B: confluent

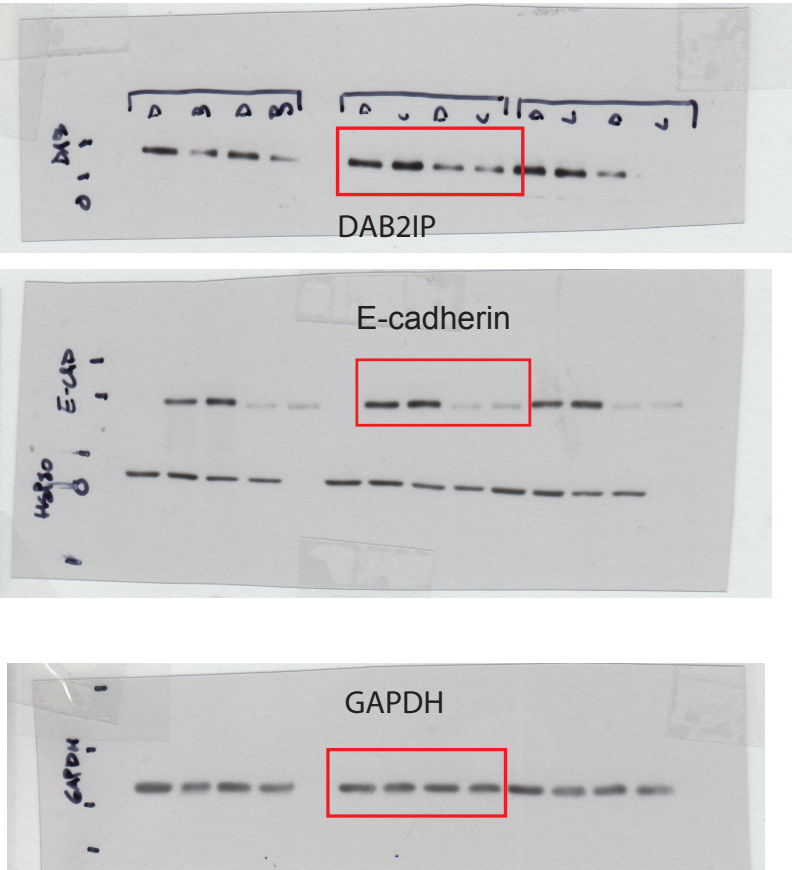

Figure S3C: subconfluent

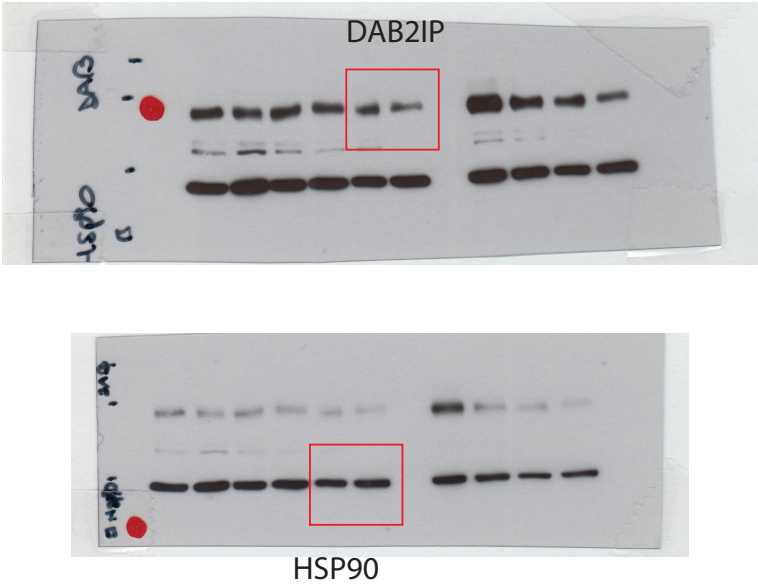

Figure S3C: confluent

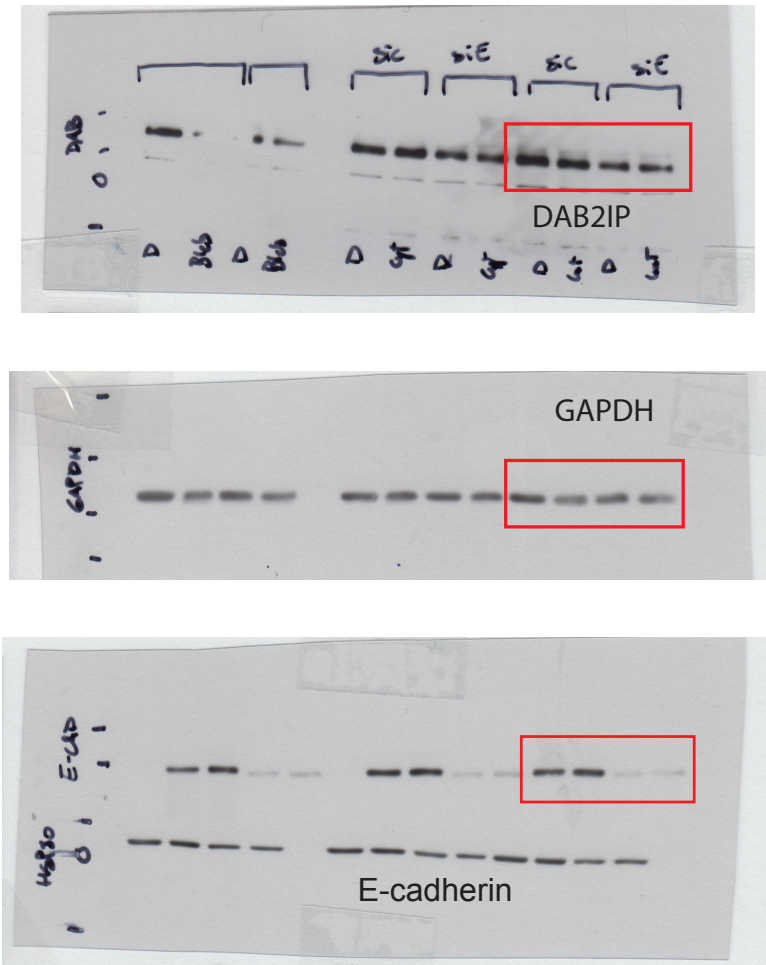



Figure S3D: Lata

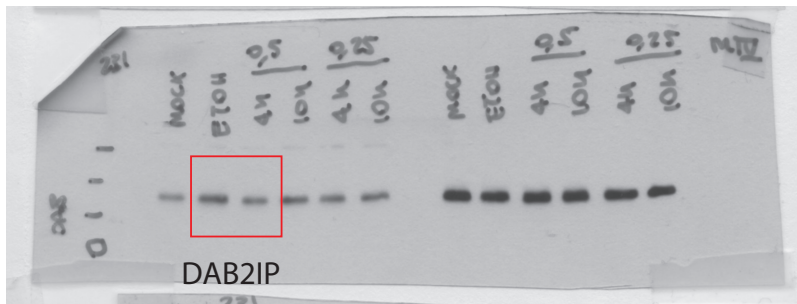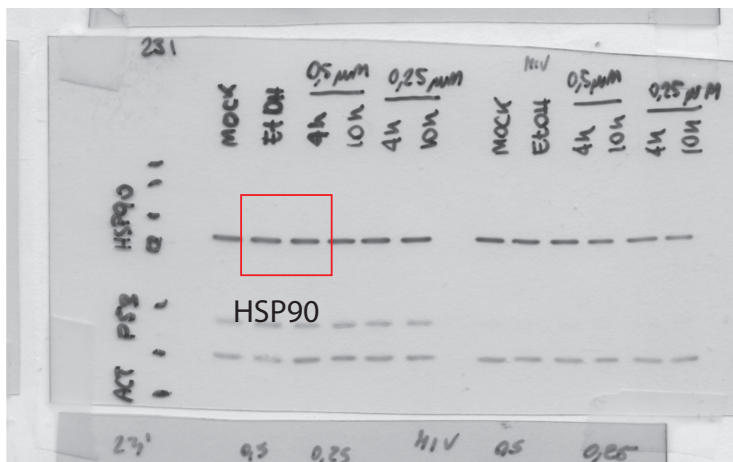

Figure S3D: CytD

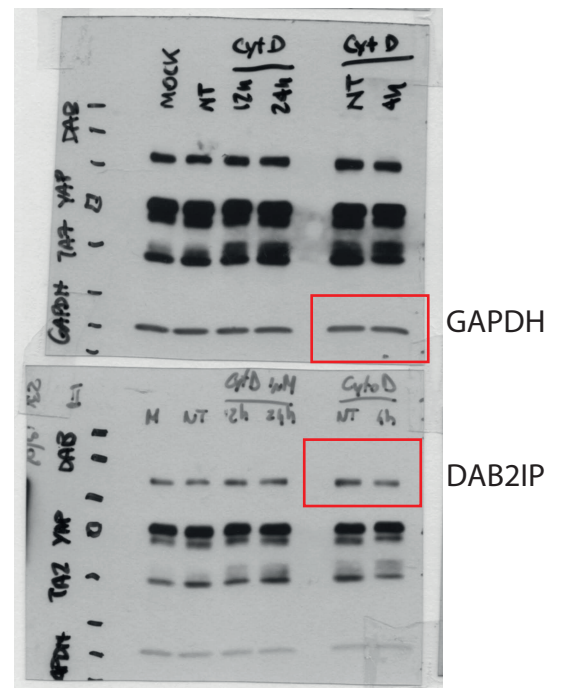

Figure S3E

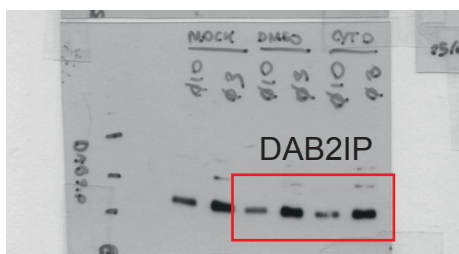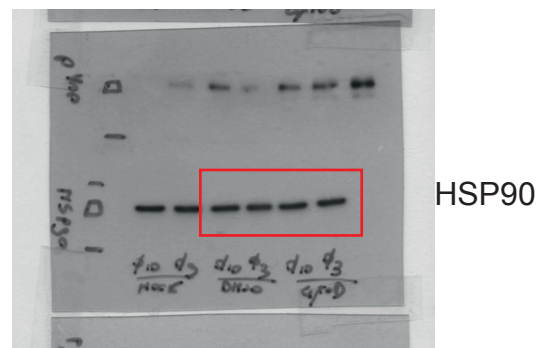

Figure S4B

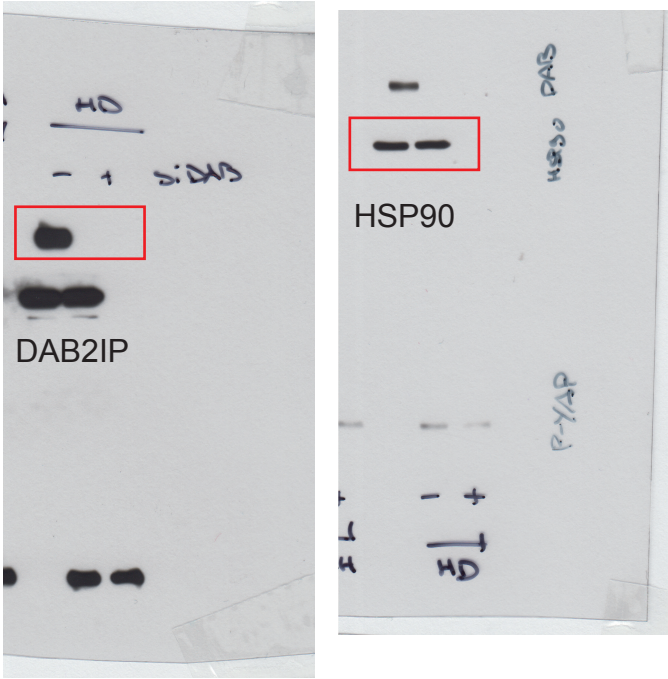

Figure S4C

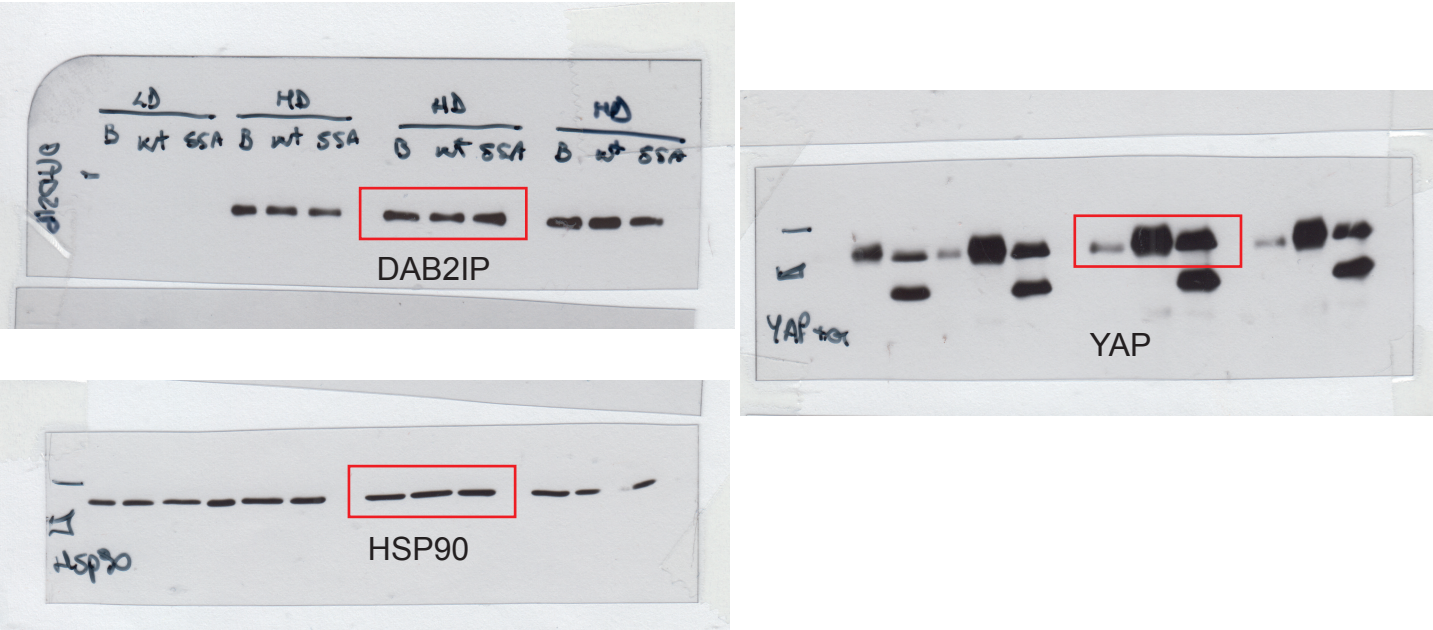



Western blot analysis of p-YAP S127 in H1299 cells. The blot shows two rows of bands. The top row is labeled 'p-YAP S127' and the bottom row is labeled 'p-YAP S127' (with a red box around the bands). The lanes are labeled with dates and conditions: 13.03, 27.03.18, and 10.11.18. The bands show varying intensity across the lanes, indicating changes in p-YAP S127 levels over time and under different conditions.

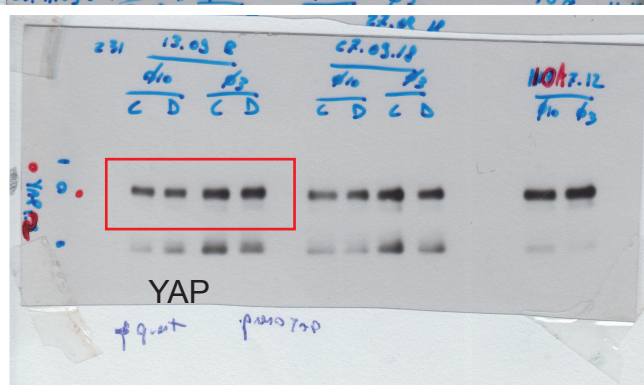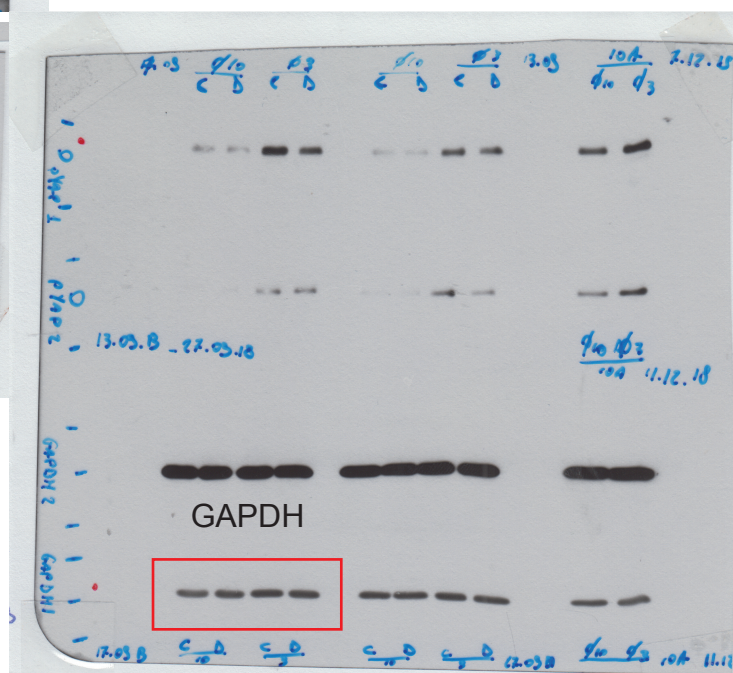

Figure S6A

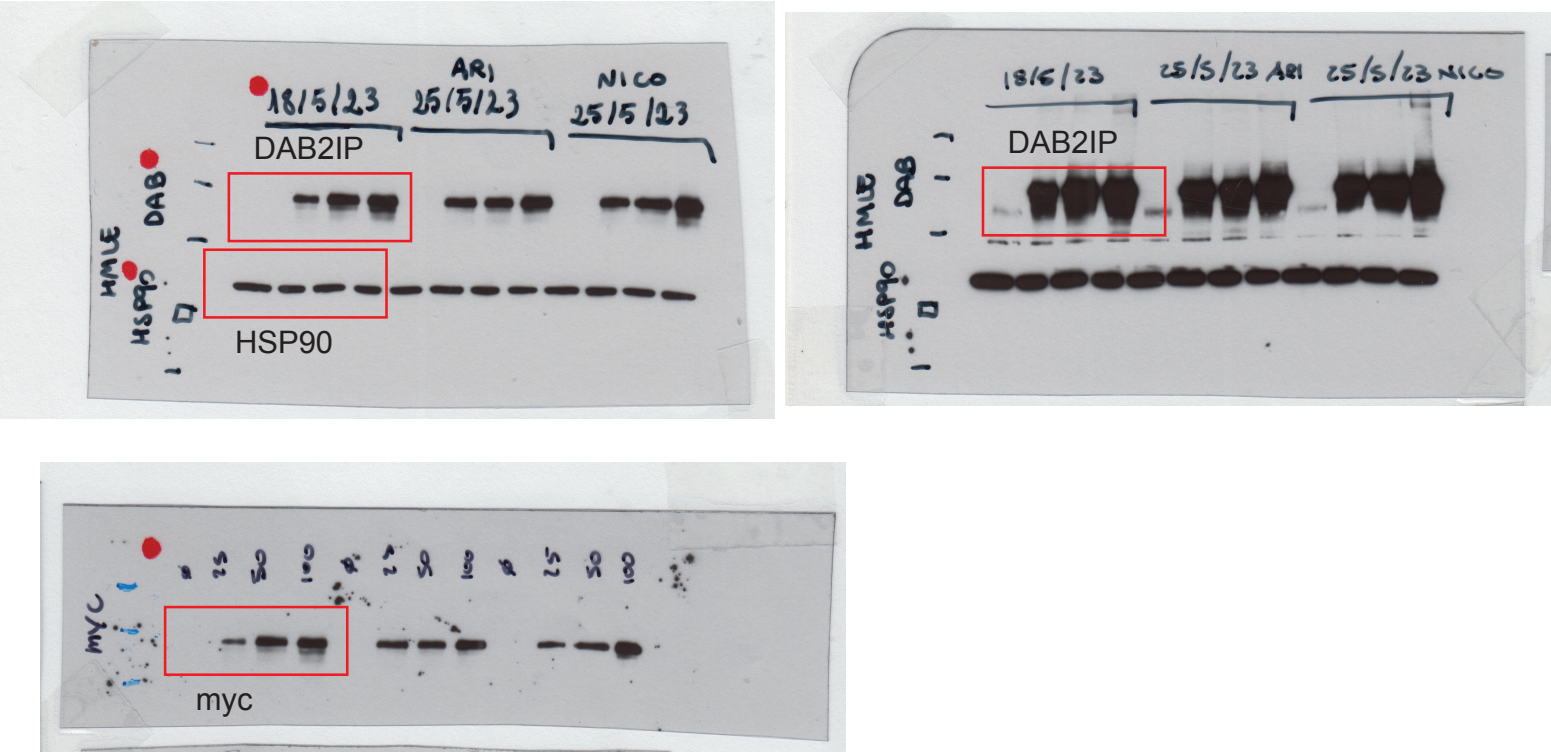

Figure S6B

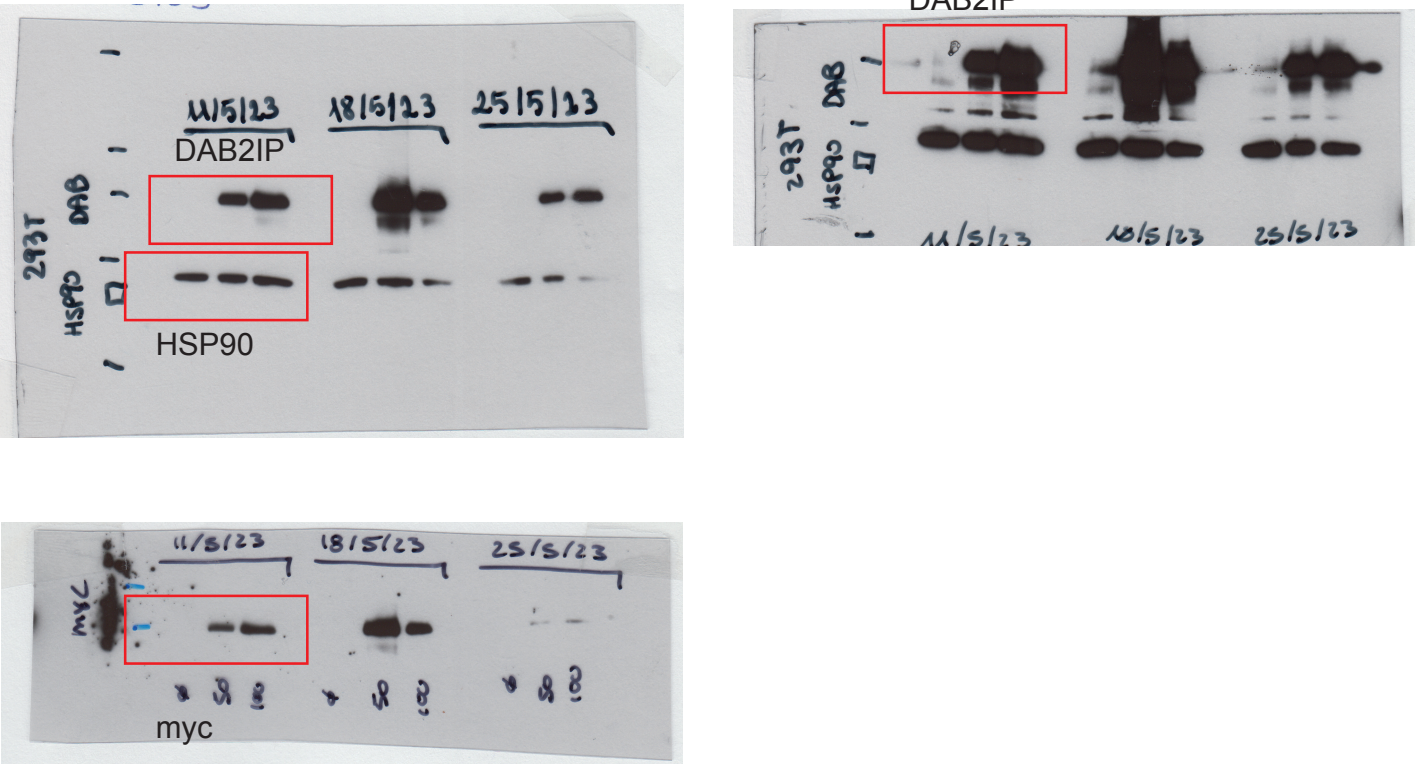

Supplement: s1 [file s1]
