# Supplementary material for: The Tumor Suppressor DAB2IP Is Regulated by Cell Contact and Contributes to YAP/TAZ Inhibition in Confluent Cells
Source: MDPI journal article supplement (doi:10.3390/cancers15133379), 2023-06-27
Supplement: s1 [file s1]

Figure 1E: E-cadherin and GAPDH

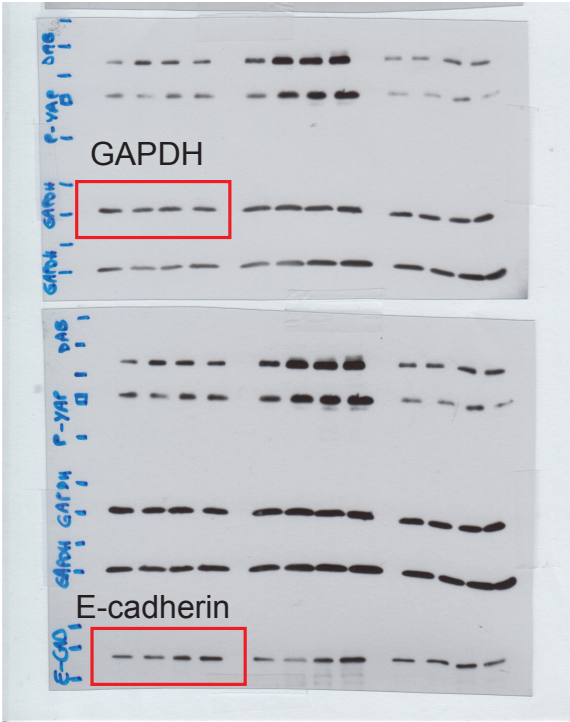

Figure 1E: DAB2IP and HSP90

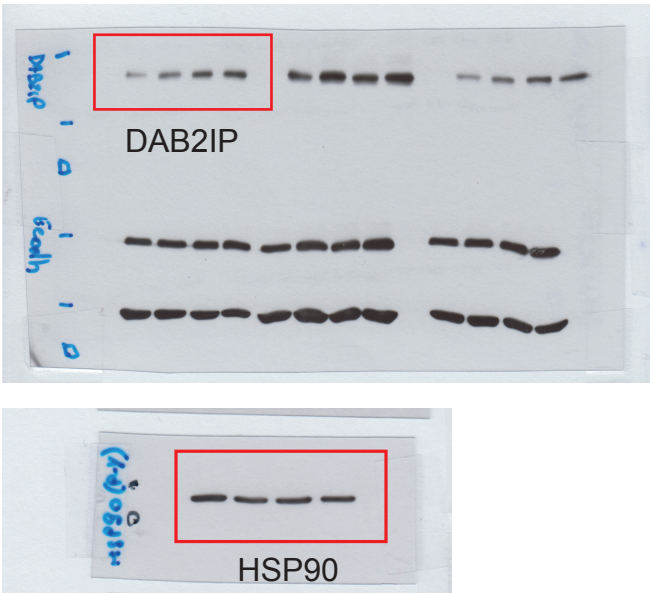

Figure 2A

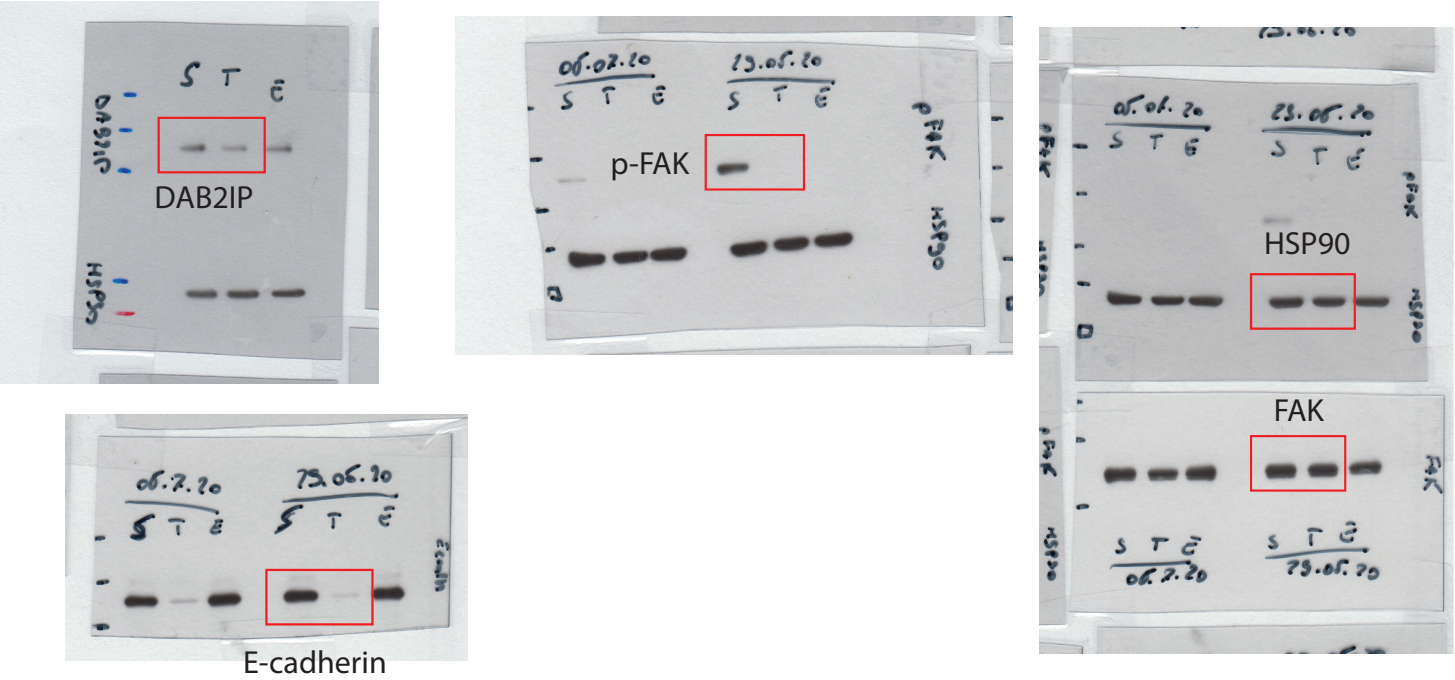

Figure 2B

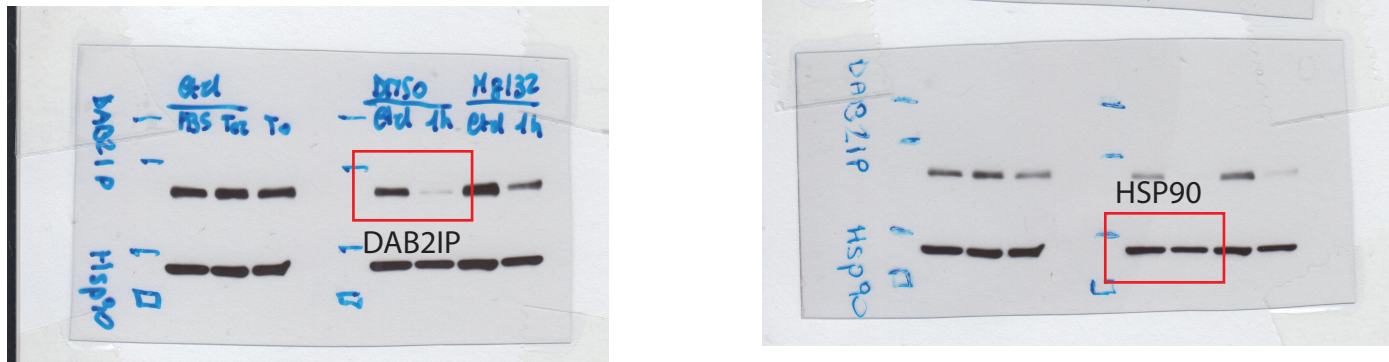

Figure 2C

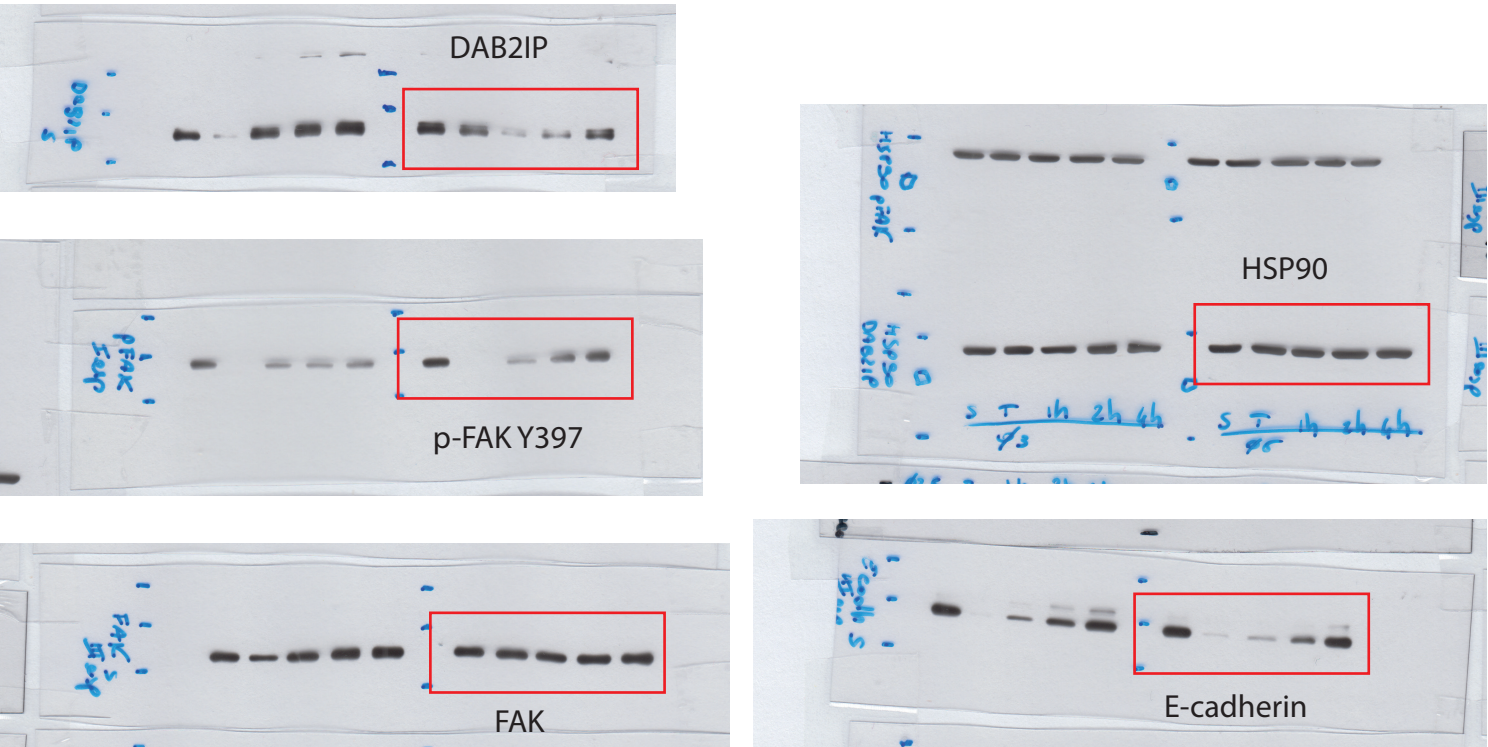



Figure 3B

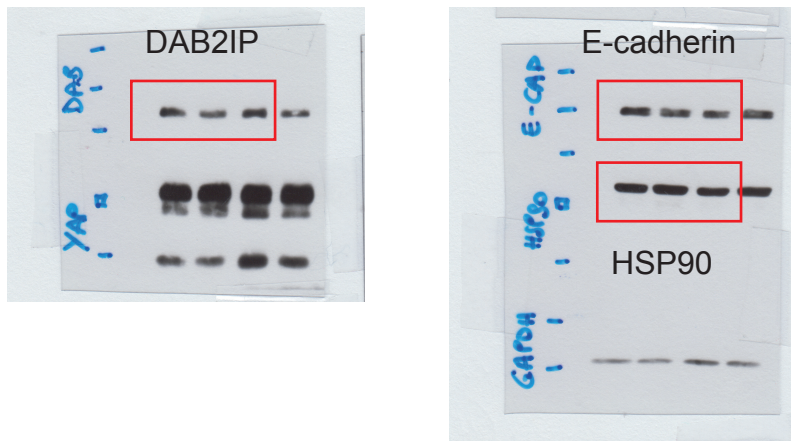

Figure 3D

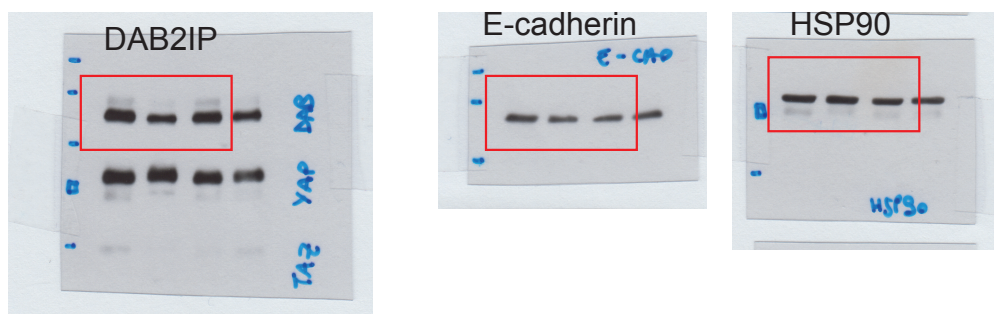

Figure 3E

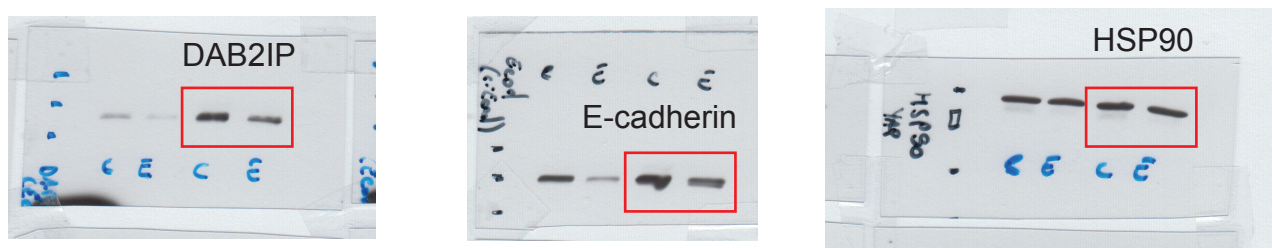

Figure 4A

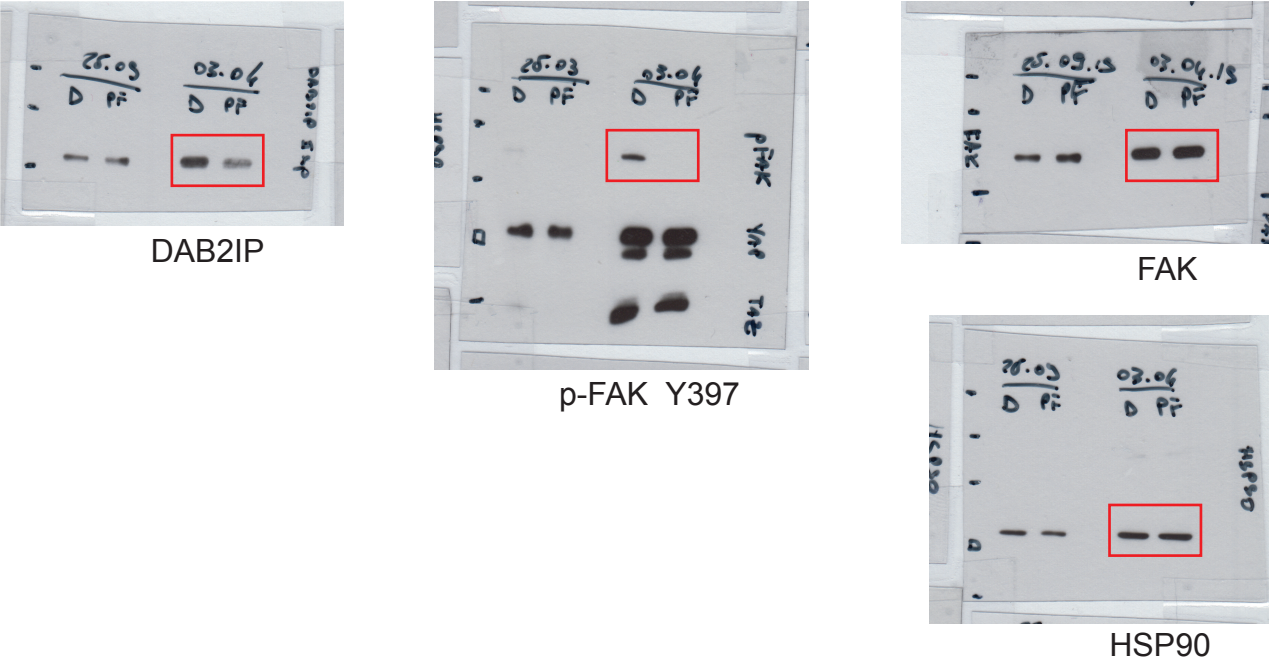

Figure 4B

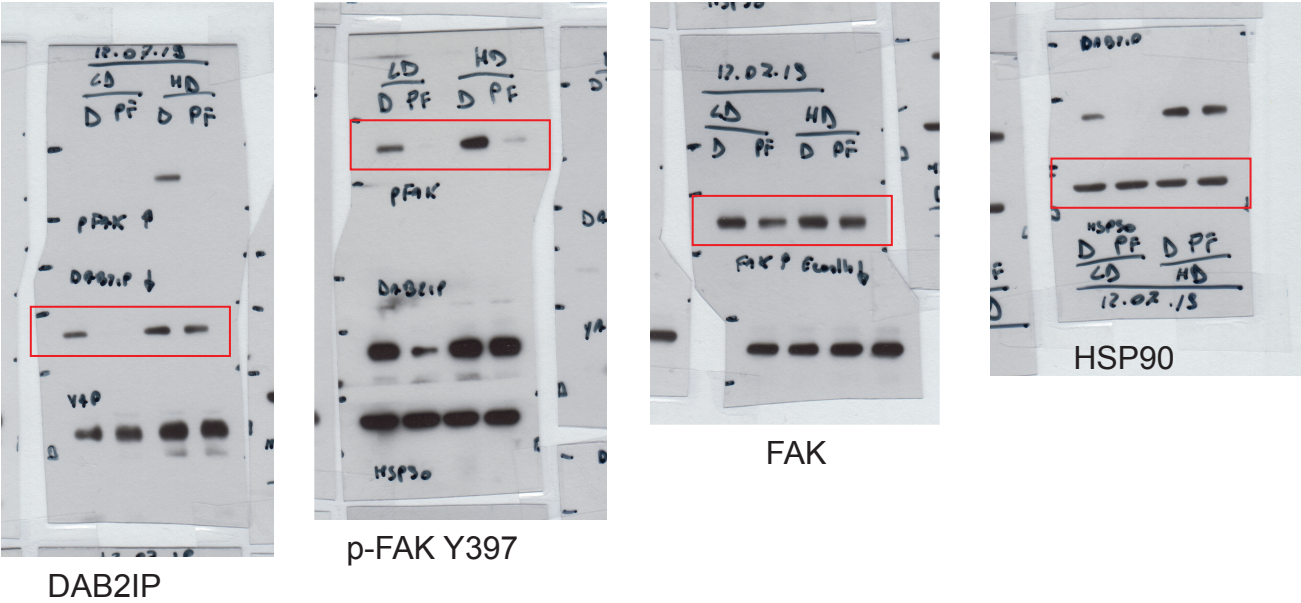



Figure 4D: CytD

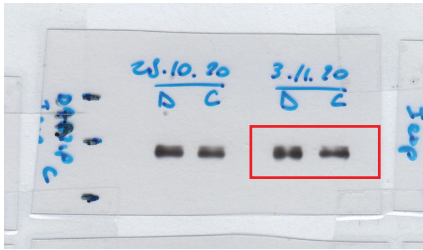

DAB2IP

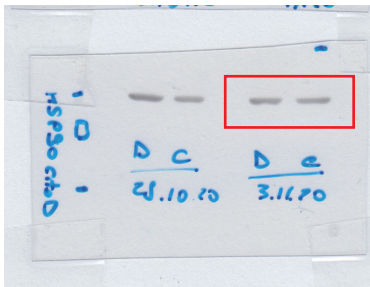

HSP90

Figure 4D: LatA

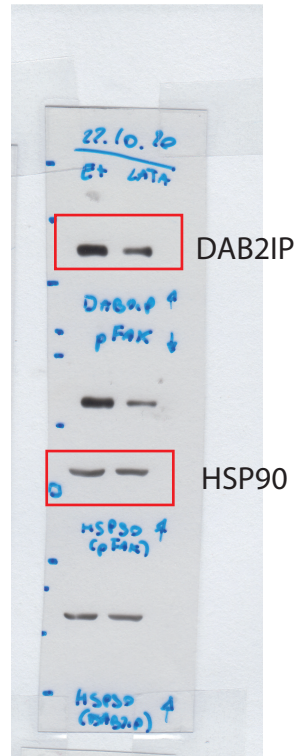

DAB2IP

HSP90

Figure 4D: Bleb

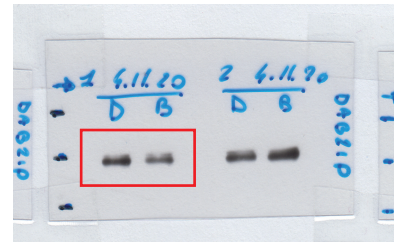

DAB2IP

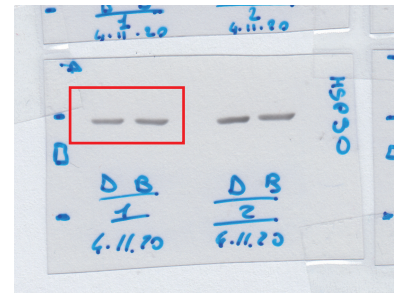

HSP90

Figure 4E

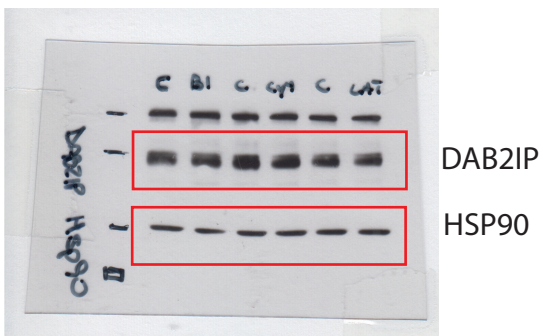

DAB2IP

HSP90

Figure 5D

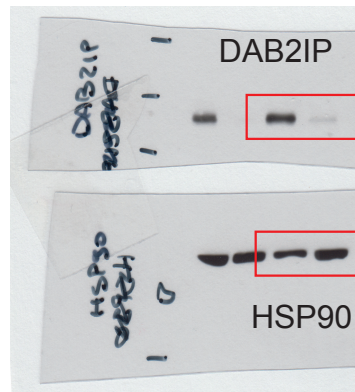



Figure 6D

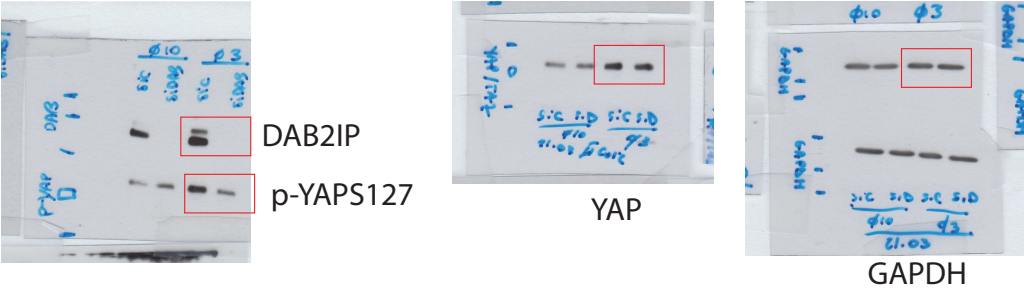

Figure 7E: left panel

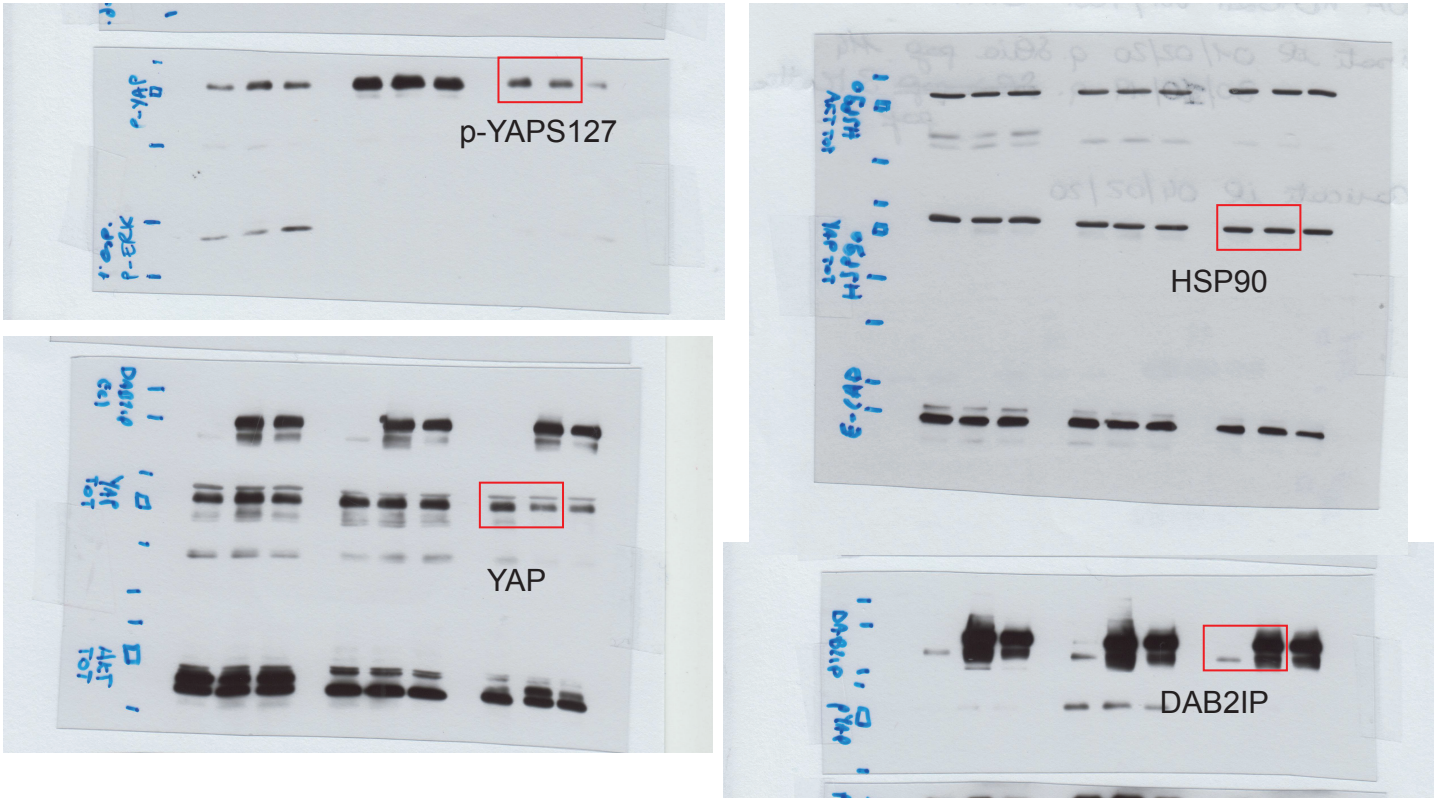

Figure 7E: right panel

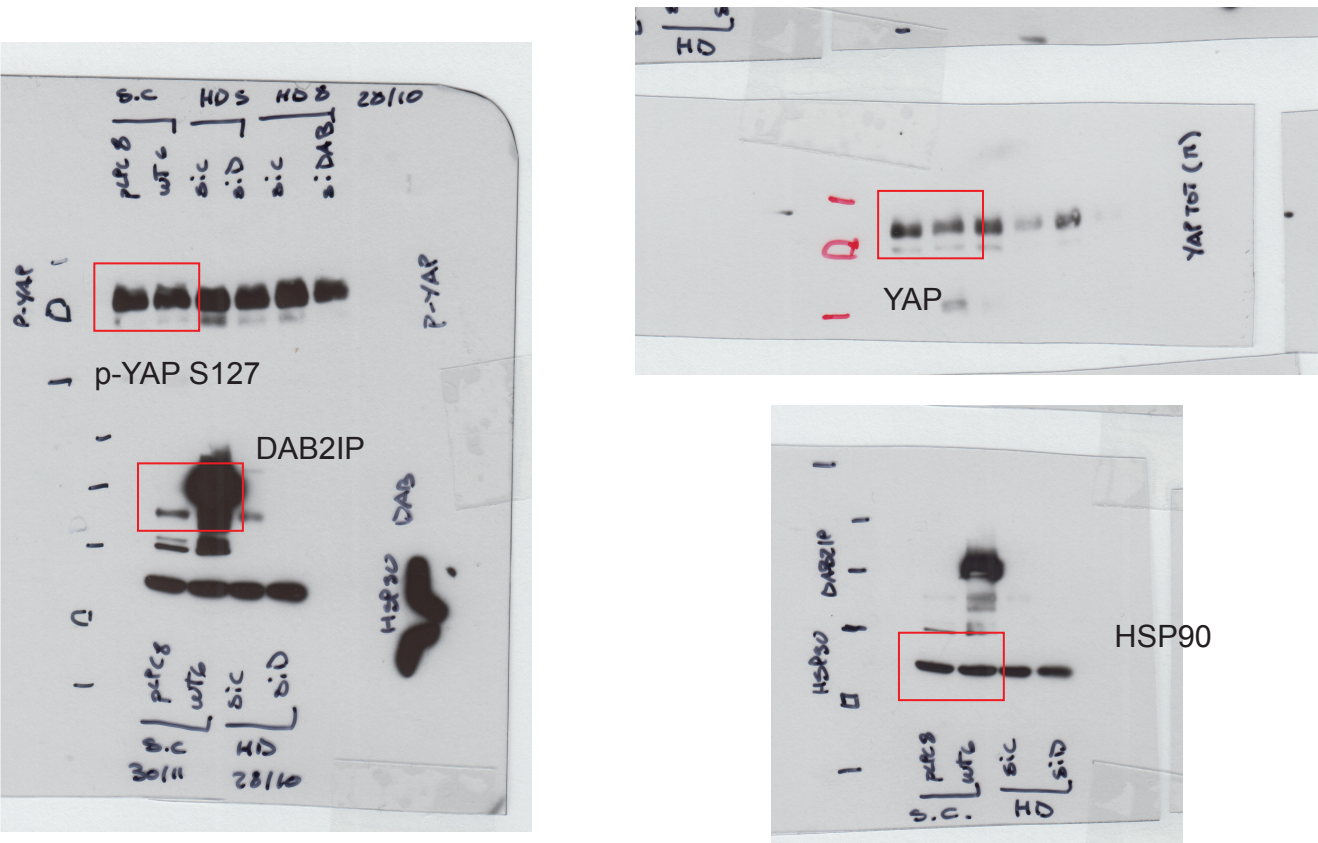



Figure 7F

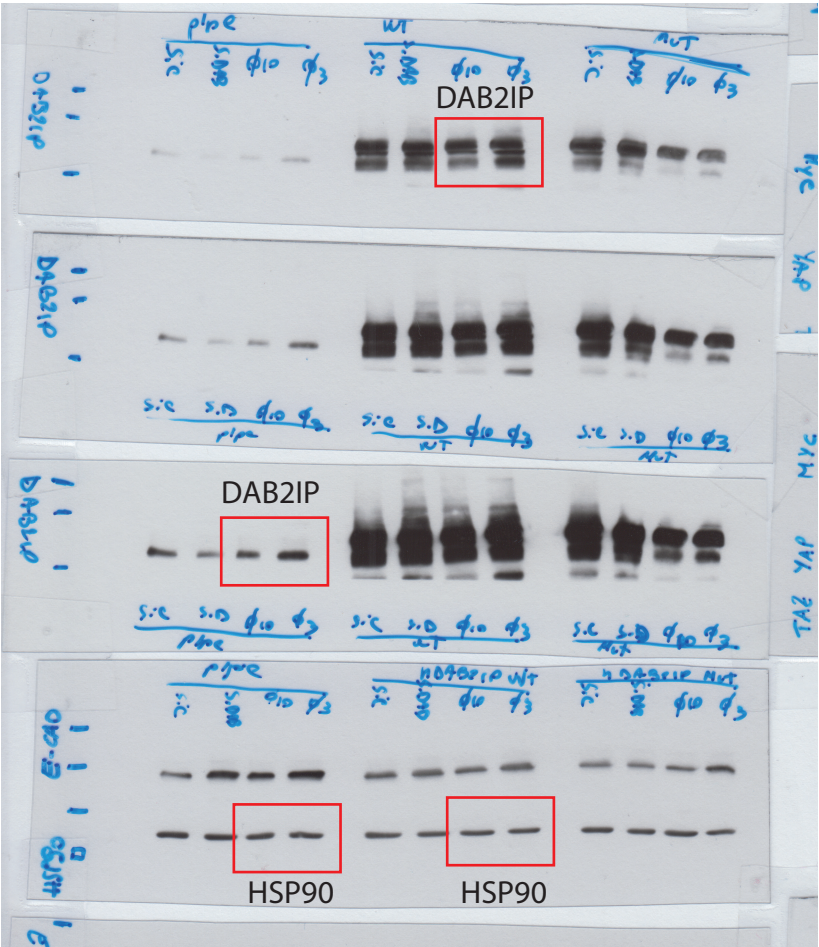

anti-DAB2IP  
in hDAB2IP cl.1

anti-DAB2IP  
in empty vector cl.8

anti-HSP90  
in empty vector cl.8 (left)  
and hDAB2IP cl.1 (right)

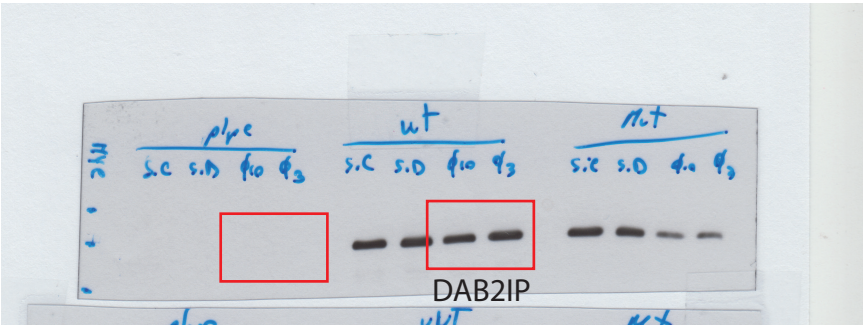

anti-Myc (9E10)  
in empty vector cl.8 (left)  
and hDAB2IP cl.1 (right)
